# Supplementary material
Source: PubMed Central journal article supplement (PMC4325762)
Supplement: AAC.02417-14_zac003153792so1.pdf [file AAC.02417-14_zac003153792so1.pdf]

***Chryseobacterium oranimense* G311**  
 EBI gene identifiers CEJ68283 – CEJ68319

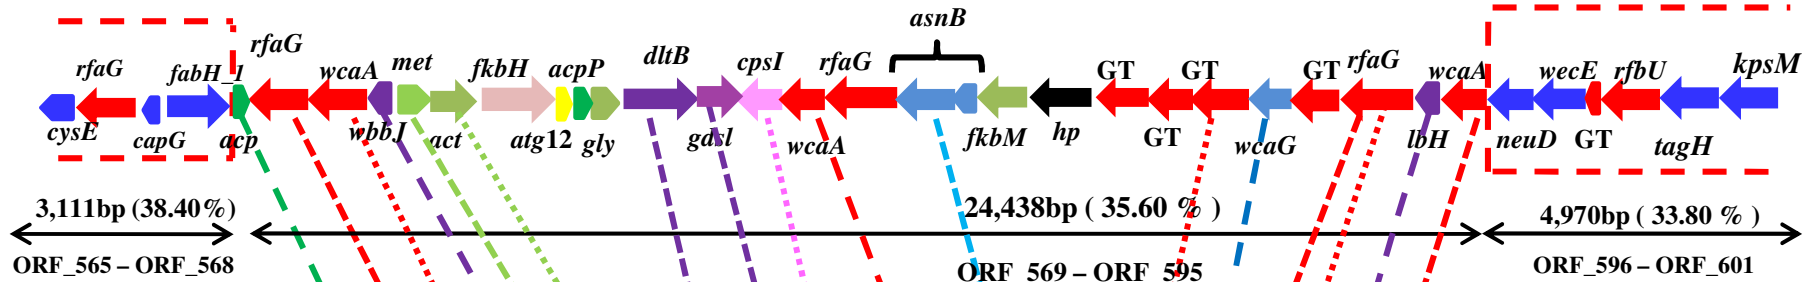

***Chryseobacterium gleum* ATCC 35910**  
 Gene identifiers EFK37838 – EFK37869

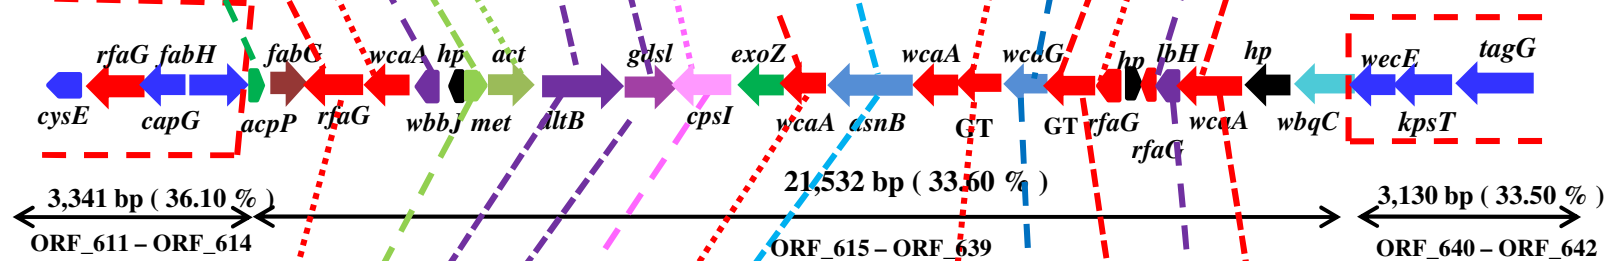

***Chryseobacterium* sp. CF 314**  
 Gene identifiers EJJ67659 – EJJ67635

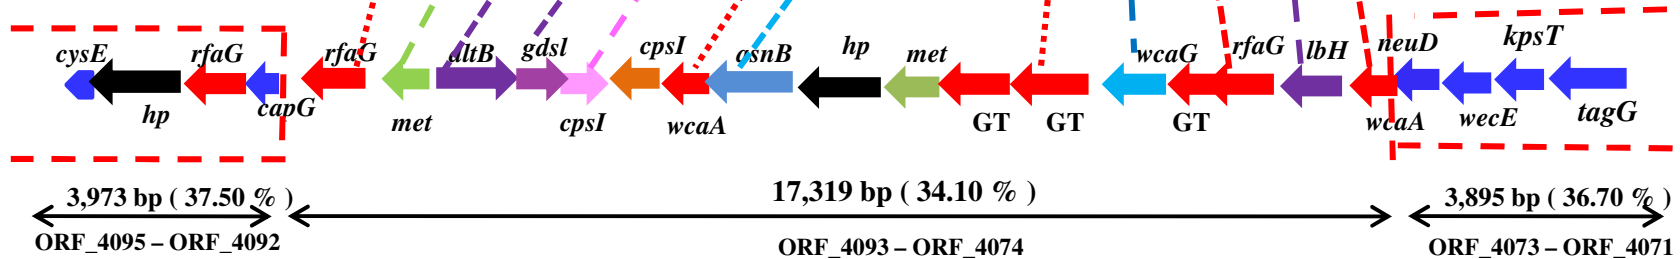

**Supplementary Figure S1.** Organization of the O-antigen gene cluster in the *Chryseobacterium oranimense* G311, *Chryseobacterium gleum* ATCC35910 and *Chryseobacterium* sp. CF314 genomes

*Chryseobacterium oranimense* G311  
EBI gene identifier CEJ68992 – CEJ69025

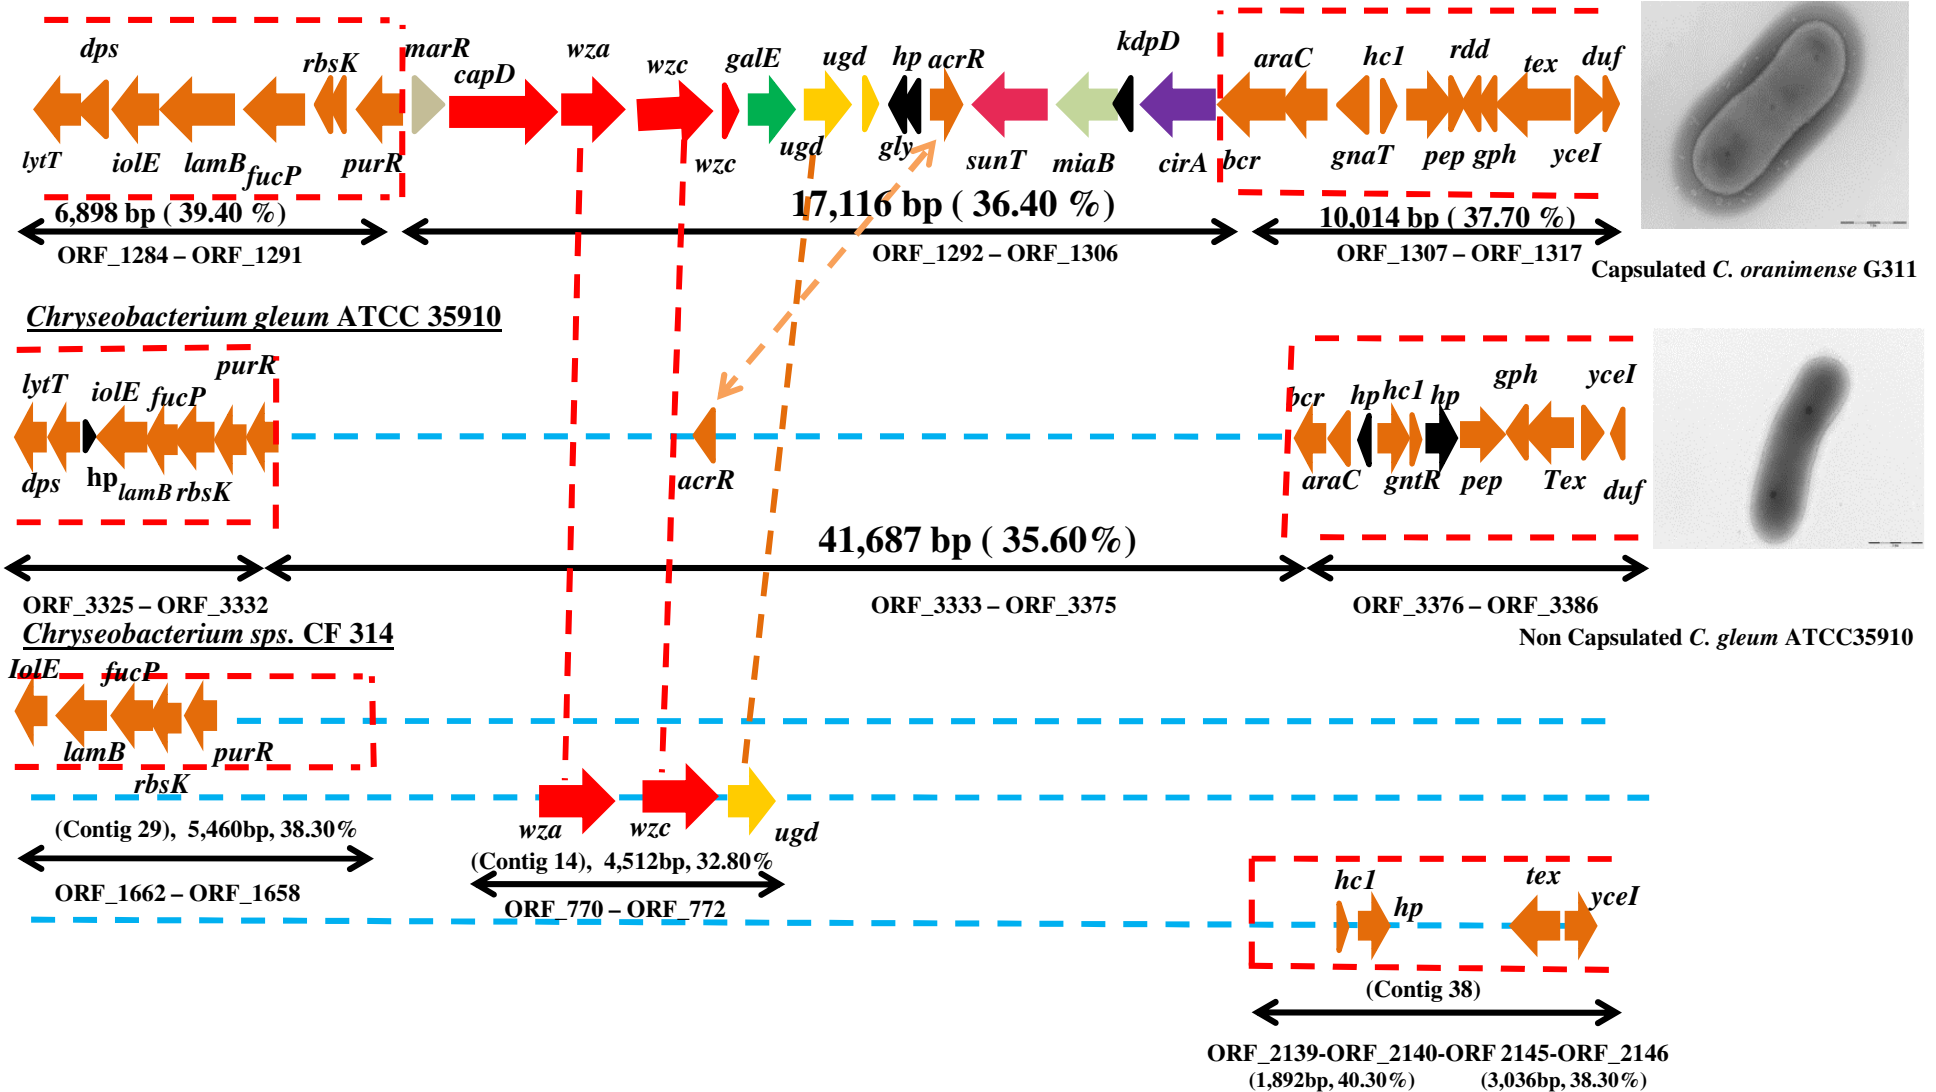

**Supplementary Figure S2.** Organization of the capsular biosynthetic machinery (K-antigen) of *C. oranimense* G311 in comparison to the *Chryseobacterium gleum* ATCC35910 and *Chryseobacterium* sp. CF 314 genomes along with Gram staining image (*Chryseobacterium* sp. CF 314 strain – not available)

1 **Supplementary Table S1:** Distribution of Cluster of Orthologous Genes (COG) categories in *Chryseobacterium oranimense* G311 genome

| COG Code | Colour                                                                              | Description                                                  | Value | Total  |
|----------|-------------------------------------------------------------------------------------|--------------------------------------------------------------|-------|--------|
| A        |    | RNA processing and modification                              | 1     | 0.032  |
| B        |    | Chromatin structure and dynamics                             | 0     | 0      |
| C        |    | Energy production and conversion                             | 153   | 4.982  |
| D        |    | Cell cycle control, mitosis and meiosis                      | 20    | 0.651  |
| E        |    | Amino acid transport and metabolism                          | 245   | 7.977  |
| F        |    | Nucleotide transport and metabolism                          | 71    | 2.311  |
| G        |    | Carbohydrate transport and metabolism                        | 174   | 5.665  |
| H        |    | Coenzyme transport and metabolism                            | 144   | 4.689  |
| I        |    | Lipid transport and metabolism                               | 143   | 4.656  |
| J        |    | Translation                                                  | 171   | 5.568  |
| K        |    | Transcription                                                | 243   | 7.912  |
| L        |    | Replication, recombination and repair                        | 150   | 4.884  |
| M        |    | Cell wall/membrane biogenesis                                | 239   | 7.782  |
| N        |    | Cell motility                                                | 12    | 0.390  |
| O        |    | Posttranslational modification, protein turnover, chaperones | 108   | 3.516  |
| P        |    | Inorganic ion transport and metabolism                       | 180   | 5.861  |
| Q        |   | Secondary metabolites biosynthesis, transport and catabolism | 76    | 2.474  |
| R        |  | General function prediction only                             | 414   | 13.481 |
| S        |  | No functional prediction                                     | 257   | 8.368  |
| T        |  | Signal transduction mechanisms                               | 157   | 5.112  |
| U        |  | Intracellular trafficking and secretion                      | 49    | 1.595  |
| V        |  | Defense mechanisms                                           | 63    | 2.051  |
| W        |  | Extracellular structures                                     | 0     | 0      |
| Y        |  | Nuclear structure                                            | 0     | 0      |
| Z        |  | Cytoskeleton                                                 | 1     | 0.032  |

2 **Supplementary Table S 2:** List of the genes of the chromosomal O-antigen-like cluster in *Chryseobacterium oranimense* G311,  
3 *Chryseobacterium gleum* ATCC 35910 and *Chryseobacterium* sp. CF314 and the K-antigen chromosomal cluster of *Chryseobacterium*  
4 *oranimense* G311 and *Chryseobacterium gleum* ATCC 35910

| Gene                                                                              | ORF/EBI Gene identifier | Gene Name   | Length (aa) | Function                                                        |
|-----------------------------------------------------------------------------------|-------------------------|-------------|-------------|-----------------------------------------------------------------|
| <b>O - antigen chromosomal cluster of <i>Chryseobacterium oranimense</i> G311</b> |                         |             |             |                                                                 |
| Gene_1                                                                            | 565/CEJ68283            | <i>cysE</i> | 121         | Serine acetyltransferase-like protein                           |
| Gene_2                                                                            | 566/CEJ68284            | <i>rfaG</i> | 383         | Glycosyl transferase, group 1                                   |
| Gene_3                                                                            | 567/CEJ68285            | <i>capG</i> | 187         | Acetyltransferase                                               |
| Gene_4                                                                            | 568/CEJ68286            | <i>fabH</i> | 324         | 3-Oxoacyl-[acyl-carrier-protein] synthase, KASIII (EC 2.3.1.41) |
| Gene_5                                                                            | 569/CEJ68287            | <i>acp</i>  | 77          | Acyl-carrier-protein                                            |
| Gene_6                                                                            | 570/CEJ68288            | <i>rfaG</i> | 389         | Glycosyl transferase, group 1                                   |
| Gene_7                                                                            | 571/CEJ68289            | <i>wcaA</i> | 279         | Glycosyl transferase, family 2                                  |
| Gene_8                                                                            | 572/CEJ68290            | <i>wbbJ</i> | 180         | Maltose O-acetyltransferase                                     |
| Gene_9                                                                            | 573/CEJ68291            | <i>met</i>  | 256         | O-Methyltransferase                                             |
| Gene_10                                                                           | 574//CEJ68292           | <i>act</i>  | 342         | Acyltransferase 3                                               |
| Gene_11                                                                           | 575/CEJ68293            | <i>fkbH</i> | 575         | Methoxymalonyl-ACP-acid phosphatases                            |

|         |              |              |     |                                                                                  |
|---------|--------------|--------------|-----|----------------------------------------------------------------------------------|
| Gene_12 | 576/CEJ68294 | <i>atg12</i> | 51  | Ubiquitin-like protein <i>atg12</i>                                              |
| Gene_13 | 577/CEJ68295 | <i>acpP</i>  | 79  | Acyl carrier protein                                                             |
| Gene_14 | 578/CEJ68296 | <i>gly</i>   | 125 | Lactoylglutathione lyase                                                         |
| Gene_15 | 579/CEJ68297 | <i>dltB</i>  | 471 | O-acetyltransferase                                                              |
| Gene_16 | 580/CEJ68298 | <i>gdsl</i>  | 307 | Lipase GDSL, hydrolase family                                                    |
| Gene_17 | 581/CEJ68299 | <i>cpsI</i>  | 312 | Capsular polysaccharide biosynthesis protein <i>cpsI</i>                         |
| Gene_18 | 582/CEJ68300 | <i>wcaA</i>  | 311 | Glycosyltransferase/ capsular polysaccharide biosynthesis protein<br><i>cpsI</i> |
| Gene_19 | 583/CEJ68301 | <i>rfaG</i>  | 382 | Glycosyltransferase, group 1                                                     |
| Gene_20 | 584/CEJ68302 | <i>asnB</i>  | 360 | Asparagine synthetase                                                            |
| Gene_21 | 585/CEJ68303 | <i>asnB</i>  | 168 | Asparagine synthetase                                                            |
| Gene_22 | 586/CEJ68304 | <i>fkbM</i>  | 272 | Methyltransferase                                                                |
| Gene_23 | 587/CEJ68305 | hp           | 379 | Hypothetical protein                                                             |
| Gene_24 | 588/CEJ68306 | GT           | 320 | Glycosyltransferase, family 1                                                    |
| Gene_25 | 589/CEJ68307 | GT           | 262 | Glycosyltransferase, family 2                                                    |
| Gene_26 | 590/CEJ68308 | GT           | 316 | Glycosyl transferase, family 2                                                   |
| Gene_27 | 591/CEJ68309 | <i>wcaG</i>  | 222 | NDP-hexose 4-ketoreductase                                                       |
| Gene_28 | 592/CEJ68310 | GT           | 287 | Glycosyltransferase, group 2                                                     |

|                                                                                  |              |             |     |                                                                                  |
|----------------------------------------------------------------------------------|--------------|-------------|-----|----------------------------------------------------------------------------------|
| Gene_29                                                                          | 593/CEJ68311 | <i>rfaG</i> | 394 | Glycosyltransferase, family 2                                                    |
| Gene_30                                                                          | 594/CEJ68312 | <i>lbH</i>  | 198 | Exopolysaccharide biosynthesis protein, acetyltransferase<br><i>lbH_MAT</i> like |
| Gene_31                                                                          | 595/CEJ68313 | <i>wcaA</i> | 292 | Glycosyltransferase, family 2                                                    |
| Gene_32                                                                          | 596/CEJ68314 | <i>neuD</i> | 209 | Putative acyltransferase                                                         |
| Gene_33                                                                          | 597/CEJ68315 | <i>wecE</i> | 360 | UDP-4-amino-4-deoxy-L-arabinose--oxoglutarate<br>aminotransferase                |
| Gene_34                                                                          | 598/CEJ68316 | GT          | 50  | Glycosyltransferase, LPS biosynthesis protein                                    |
| Gene_35                                                                          | 599/CEJ68317 | <i>rfbU</i> | 368 | LPS biosynthesis protein                                                         |
| Gene_36                                                                          | 600/CEJ68318 | <i>tagH</i> | 395 | ATP-binding protein                                                              |
| Gene_37                                                                          | 601/CEJ68319 | <i>kpsM</i> | 280 | Polysialic acid transport protein                                                |
| <b>O-antigen chromosomal cluster of <i>Chryseobacterium gleum</i> ATCC 35910</b> |              |             |     |                                                                                  |
| Gene_1                                                                           | 611/EFK37838 | <i>cysE</i> | 185 | Serine acetyltransferase-like protein                                            |
| Gene_2                                                                           | 612/EFK37839 | <i>rfaG</i> | 383 | Glycosyl transferase, family 1                                                   |
| Gene_3                                                                           | 613/EFK37840 | <i>capG</i> | 190 | Capsular polysaccharide biosynthesis protein <i>capG</i>                         |
| Gene_4                                                                           | 614/EFK37841 | <i>fabH</i> | 323 | 3-Oxoacyl-ACP synthase                                                           |
| Gene_5                                                                           | 615/EFK37842 | <i>acpP</i> | 77  | Acyl carrier protein                                                             |
| Gene_6                                                                           | 616/EFK37843 | <i>fabG</i> | 252 | 3-Oxoacyl-[acyl-carrier-protein] reductase                                       |

|         |              |             |     |                                                                        |
|---------|--------------|-------------|-----|------------------------------------------------------------------------|
| Gene_7  | 617/EFK37844 | <i>rfaG</i> | 386 | Glycosyltransferase, Group 1                                           |
| Gene_8  | 618/EFK37845 | <i>wcaA</i> | 278 | Glycosyltransferase, Group 2                                           |
| Gene_9  | 619/EFK37846 | <i>wbbJ</i> | 181 | Exopolysaccharide biosynthesis protein                                 |
| Gene_10 | 620/EFK37847 | <i>hp</i>   | 43  | Hypothetical protein                                                   |
| Gene_11 | 621/EFK37848 | <i>met</i>  | 256 | O-Methyltransferase                                                    |
| Gene_12 | 622/EFK37849 | <i>act</i>  | 342 | Acetyltransferase 3 COG 1835                                           |
| Gene_13 | 623/EFK37850 | <i>dltB</i> | 477 | O-Acetyltransferase                                                    |
| Gene_14 | 624/EFK37851 | <i>gdsl</i> | 305 | Lipase GDSL (Hydrolase family)                                         |
| Gene_15 | 625/EFK37852 | <i>cpsI</i> | 313 | Capsular polysaccharide biosynthesis protein <i>cpsI</i>               |
| Gene_16 | 626/EFK37853 | <i>exoZ</i> | 332 | Acetyltransferase, exopolysaccharide biosynthesis protein <i>exoZ</i>  |
| Gene_17 | 627/EFK37854 | <i>wcaA</i> | 312 | Glycosyltransferase/ Capsular polysaccharide biosynthesis protein CpsI |
| Gene_18 | 628/EFK37855 | <i>asnB</i> | 598 | Asparagine synthetase [glutamine-hydrolyzing] (EC 6.3.5.4)             |
| Gene_19 | 629/EFK37856 | <i>wcaA</i> | 307 | Glycosyltransferase, family 2                                          |
| Gene_20 | 630/EFK37857 | GT          | 306 | Glycosyl transferase, family 2                                         |
| Gene_21 | 631/EFK37858 | <i>wcaG</i> | 222 | NAD-dependent epimerase/dehydratase                                    |
| Gene_22 | 632/EFK37859 | GT          | 289 | Glycosyl transferase, group 2                                          |

|         |              |             |     |                                                                                  |
|---------|--------------|-------------|-----|----------------------------------------------------------------------------------|
| Gene_23 | 633/EFK37860 | <i>rfaG</i> | 179 | Glycosyltransferase, family 2                                                    |
| Gene_24 | 634/EFK37861 | hp          | 45  | Hypothetical protein                                                             |
| Gene_25 | 635/EFK37862 | <i>rfaG</i> | 125 | Glycosyltransferase, Group 1                                                     |
| Gene_26 | 636/EFK37863 | <i>lbH</i>  | 199 | Exopolysaccharide biosynthesis protein, acetyltransferase<br><i>lbH_MAT</i> like |
| Gene_27 | 637/EFK37864 | <i>wcaA</i> | 457 | Glycosyl transferase, family 2                                                   |
| Gene_28 | 638/EFK37865 | hp          | 317 | Hypothetical protein                                                             |
| Gene_29 | 639/EFK37866 | <i>wbqC</i> | 238 | Putative glycine transferase in O-antigen biosynthesis cluster                   |
| Gene_30 | 640/EFK37867 | <i>wecE</i> | 360 | Aminotransferase <i>degT</i>                                                     |
| Gene_31 | 641/EFK37868 | <i>kpsT</i> | 398 | ABC transporter ATP-binding protein, <i>wzt</i> -like                            |
| Gene_32 | 642/EFK37869 | <i>tagG</i> | 280 | ABC superfamily ATP-binding cassette transporter permease<br>protein             |

**O-antigen chromosomal cluster of *Chryseobacterium sp.* CF314**

|        |               |             |     |                                                          |
|--------|---------------|-------------|-----|----------------------------------------------------------|
| Gene_1 | 4095/EJL67659 | <i>cysE</i> | 185 | Serine acetyltransferase-like protein                    |
| Gene_2 | 4094/EJL67658 | hp          | 403 | Hypothetical protein                                     |
| Gene_3 | 4093/EJL67657 | <i>rfaG</i> | 383 | Glycosyltransferase, family 1                            |
| Gene_4 | 4092/EJL67656 | <i>capG</i> | 187 | Capsular polysaccharide biosynthesis protein <i>capG</i> |



|         |               |             |     |                                                                                 |
|---------|---------------|-------------|-----|---------------------------------------------------------------------------------|
| Gene_5  | 4091/EJL67655 | <i>rfaG</i> | 385 | Glycosyltransferase, family 1                                                   |
| Gene_6  | 4090/EJL67654 | <i>met</i>  | 257 | O-Methyltransferase                                                             |
| Gene_7  | 4089/EJL67653 | <i>dltB</i> | 477 | O-Acetyltransferase                                                             |
| Gene_8  | 4088/EJL67652 | <i>gdsI</i> | 296 | Hypothetical protein                                                            |
| Gene_9  | 4087/EJL67651 | <i>cpsI</i> | 315 | Capsular polysaccharide biosynthesis protein <i>cpsI</i>                        |
| Gene_10 | 4086/EJL67650 | <i>cpsI</i> | 313 | Capsular polysaccharide biosynthesis protein <i>cpsI</i>                        |
| Gene_11 | 4085/EJL67649 | <i>wcaA</i> | 312 | Glycosyltransferase/capsular polysaccharide biosynthesis protein<br><i>cpsI</i> |
| Gene_12 | 4084/EJL67648 | <i>asnB</i> | 598 | Asparagine synthetase [glutamine-hydrolyzing] (EC 6.3.5.4)                      |
| Gene_13 | 4083/EJL67647 | hp          | 531 | Hypothetical protein                                                            |
| Gene_14 | 4082/EJL67646 | <i>met</i>  | 261 | Methyltransferase                                                               |
| Gene_15 | 4081/EJL67645 | GT          | 307 | Glycosyltransferase, family 2                                                   |
| Gene_16 | 4080/EJL67644 | GT          | 306 | Glycosyltransferase, family 2                                                   |
| Gene_17 | 4079/EJL67643 | <i>wcaG</i> | 222 | NAD-dependent epimerase/Dehydratase                                             |
| Gene_18 | 4078/EJL67642 | GT          | 290 | Glycosyl transferase, group 2                                                   |
| Gene_19 | 4077/EJL67641 | <i>rfaG</i> | 394 | Glycosyltransferase, group 1                                                    |
| Gene_20 | 4076/EJL67640 | <i>lbH</i>  | 196 | Exopolysaccharide biosynthesis acetyltransferase <i>lbH</i> _MAT like           |

|                                                                                 |               |             |     |                                                                                                                          |
|---------------------------------------------------------------------------------|---------------|-------------|-----|--------------------------------------------------------------------------------------------------------------------------|
| Gene 21                                                                         | 4075/EJL67639 | <i>wcaA</i> | 301 | Glycosyltransferase, family 2                                                                                            |
| Gene_22                                                                         | 4074/EJL67638 | <i>neuD</i> | 211 | Hexapeptide transferase / Sugar O-acyltransferase <i>neuD</i>                                                            |
| Gene_23                                                                         | 4073/EJL67637 | <i>wecE</i> | 360 | Aminotransferase <i>degT</i>                                                                                             |
| Gene_24                                                                         | 4072/EJL67636 | <i>kpsT</i> | 419 | ABC transporter ATP-binding protein <i>wztC</i>                                                                          |
| Gene_25                                                                         | 4071/EJL67635 | <i>tagG</i> | 282 | ABC superfamily ATP binding cassette transporter permease protein                                                        |
| <b>K-antigen chromosomal cluster of <i>Chryseobacterium oranimense</i> G311</b> |               |             |     |                                                                                                                          |
| Gene_1                                                                          | 1284/CEJ68992 | <i>lytT</i> | 231 | DNA-binding response regulator                                                                                           |
| Gene_2                                                                          | 1285/CEJ68993 | <i>dps</i>  | 157 | Non-specific DNA-binding protein <i>dps</i> / Iron-binding ferritin-like antioxidant protein / Ferroxidase (EC 1.16.3.1) |
| Gene_3                                                                          | 1286/CEJ68994 | <i>iolE</i> | 279 | D-tagatose 3-epimerase                                                                                                   |
| Gene_4                                                                          | 1287/CEJ68995 | <i>lamB</i> | 469 | Maltoporin                                                                                                               |
| Gene_5                                                                          | 1288/CEJ68996 | <i>fucP</i> | 414 | Fucose permease                                                                                                          |
| Gene_6                                                                          | 1289/CEJ68997 | <i>rbsK</i> | 128 | Fructokinase (EC 2.7.1.4)                                                                                                |
| Gene_7                                                                          | 1290/CEJ68998 | <i>rbsK</i> | 176 | Fructokinase (EC 2.7.1.4)                                                                                                |
| Gene_8                                                                          | 1291/CEJ68999 | <i>purR</i> | 335 | Periplasmic binding protein/ <i>LacI</i> transcriptional regulator                                                       |
| Gene_9                                                                          | 1292/CEJ69000 | <i>marR</i> | 153 | Transcriptional regulator, <i>marR</i> family                                                                            |
| Gene_10                                                                         | 1293/CEJ69001 | <i>capD</i> | 637 | UDP-N-acetylglucosamine 4,6-dehydratase                                                                                  |

|         |               |             |     |                                              |
|---------|---------------|-------------|-----|----------------------------------------------|
| Gene_11 | 1294/CEJ69002 | <i>wza</i>  | 263 | Polysaccharide export outer membrane protein |
| Gene_12 | 1295/CEJ69003 | <i>wzc</i>  | 692 | Tyrosine-protein kinase Wzc (EC 2.7.10.2)    |
| Gene_13 | 1296/CEJ69004 | <i>wzc</i>  | 85  | Tyrosine-protein kinase Wzc (EC 2.7.10.2)    |
| Gene_14 | 1297/CEJ69005 | <i>galE</i> | 322 | UDP-glucose 4-epimerase (EC 5.1.3.2)         |
| Gene_15 | 1298/CEJ69006 | <i>ugd</i>  | 231 | UDP-glucose dehydrogenase (EC 1.1.1.22)      |
| Gene_16 | 1299/CEJ69007 | <i>ugd</i>  | 199 | UDP-glucose dehydrogenase (EC 1.1.1.22)      |
| Gene_17 | 1300/CEJ69008 | <i>gly</i>  | 104 | Glyoxalase                                   |
| Gene_18 | 1301/CEJ69009 | <i>hp</i>   | 67  | Hypothetical protein                         |
| Gene_19 | 1302/CEJ69010 | <i>acrR</i> | 209 | Transcriptional regulator, TetR family       |
| Gene_20 | 1303/CEJ69011 | <i>sunT</i> | 727 | ABC transporter ATP-binding protein          |
| Gene_21 | 1304/CEJ69012 | <i>miaB</i> | 423 | Putative RNA methylase                       |
| Gene_22 | 1305/CEJ69013 | <i>kdpD</i> | 50  | Histidine kinase                             |
| Gene_23 | 1306/CEJ69014 | <i>cirA</i> | 792 | TonB-dependent receptor                      |
| Gene_24 | 1307/CEJ69015 | <i>bcr</i>  | 404 | Multidrug transporter                        |
| Gene_25 | 1308/CEJ69016 | <i>araC</i> | 315 | Transcriptional regulator, AraC family       |
| Gene_26 | 1309/CEJ69017 | <i>gnaT</i> | 171 | GCN5-related N acetyltransferase             |
| Gene_27 | 1310/CEJ69018 | <i>hcI</i>  | 58  | Histone protein                              |

|         |               |             |     |                                                                                                      |
|---------|---------------|-------------|-----|------------------------------------------------------------------------------------------------------|
| Gene_28 | 1311/CEJ69019 | <i>pep</i>  | 445 | Peptidase M 28 family                                                                                |
| Gene_29 | 1312/CEJ69020 | <i>pep</i>  | 50  | Peptidase M28                                                                                        |
| Gene_30 | 1313/CEJ69021 | <i>rdd</i>  | 196 | RDD domain-containing protein                                                                        |
| Gene_31 | 1314/CEJ69022 | <i>gph</i>  | 217 | 5'-methylthioadenosine nucleosidase (EC 3.2.2.16) / S-adenosylhomocysteine nucleosidase (EC 3.2.2.9) |
| Gene_32 | 1315/CEJ69023 | <i>tex</i>  | 707 | RNA-binding domain                                                                                   |
| Gene_33 | 1316/CEJ69024 | <i>yceI</i> | 225 | Rhodanese-like domain protein                                                                        |
| Gene_34 | 1317/CEJ69025 | <i>duf</i>  | 91  | Protein of unknown function DUF1294 – cold shock protein                                             |

5

6

7
